# Supplementary material for: Summertime Characteristics of Atmospheric Polycyclic Aromatic Hydrocarbons in a Coastal City of Northern Poland
Source: MDPI journal article supplement (doi:10.3390/ijerph20054475), 2023-03-02
Supplement: s1 [file s1]

*Supplement of*

## **Summertime characteristics of atmospheric polycyclic aromatic hydrocarbons (PAHs) in a coastal city of northern Poland**

**\* Patrycja Siudek**

Correspondence to: \*Patrycja Siudek (patrycja.siudek@imgw.pl)

**Table. S1.** Correlation coefficient (r) of particulate-phase  $\Sigma_{13}\text{PAHs}$  and  $\text{PM}_{10}$  mass concentrations at the sampling site in Gdynia during the 2021 summertime study period. All values are significant at the 95% confidence level.

| Variable     | PAHs_5.21 | PAHs_6.21 | PAHs_7.21 | PAHs_8.21 | PAHs_summer.21 |
|--------------|-----------|-----------|-----------|-----------|----------------|
| PM_5.21      | -0.186    |           |           |           |                |
| PM_6.21      |           | 0.126     |           |           |                |
| PM_7.21      |           |           | -0.214    |           |                |
| PM_8.21      |           |           |           | 0.629     |                |
| PM_summer.21 |           |           |           |           | -0.186         |
